# Supplementary material for: Environmental Regulation, Technological Innovation and Development of Marine Fisheries—Evidence from Ten Coastal Regions in China
Source: MDPI journal article supplement (doi:10.3390/fishes7010020), 2022-01-14
Supplement: s1 [file s1]

**Table S1.** Development stage of China's marine fisheries.

| <b>Development Stage</b> | <b>Mean</b>   | <b>Regions</b>                        |
|--------------------------|---------------|---------------------------------------|
| First tier               | 0.4 and above | Shandong, Liaoning, Fujian            |
| Second tier              | 0.3~0.4       | Guangdong, Tianjin, Guangxi, Zhejiang |
| Third tier               | 0.25~0.3      | Hainan                                |
| Fourth tier              | 0.2~0.25      | Jiangsu, Hebei                        |
